# Supplementary material for: A generalized theory of separable effects in competing event settings
Source: Springer Nature journal article supplement (doi:10.1007/s10985-021-09530-8), 2021-09-01
Supplement: MOESM2 [file 19622164]

Noname manuscript No.  
(will be inserted by the editor)

---

## Supplementary material: A generalized theory of separable effects in competing event settings

Anonymous

the date of receipt and acceptance should be inserted later

*Key words:* Causal inference; Competing events; Effect decomposition; G-formula; Hazard functions; Separable effects.

---

Address(es) of author(s) should be given

## 1 Treatment decomposition of $A$ into $A_Y$ , $A_D$ and $A_Z$

Hitherto we have described settings in which the treatment is decomposed into 2 components,  $A_D$  and  $A_Y$ . Consider now a hypothetical treatment decomposition into 3 components  $A_D$ ,  $A_Y$  and  $A_Z$ , as illustrated in Figure 1, which is similar to Robins and Richardson's decomposition in a mediation setting [1, Figure 6(d)]. Analogous to the 2 way decomposition, we define a generalized decomposition assumption:

3 way generalized decomposition assumption: The treatment  $A$  can be decomposed into three binary components  $A_Y \in \{0, 1\}$ ,  $A_D \in \{0, 1\}$  and  $A_Z \in \{0, 1\}$  such that, in the observed data, the following determinism holds

$$A \equiv A_D \equiv A_Y \equiv A_Z, \quad (1)$$

but, in a future study,  $A_Y, A_D$  and  $A_Z$  could be assigned different values under a hypothetical intervention. For any individual in the study population and for  $k \in \{0, \dots, K\}$ , let  $Y_{k+1}^{a_Y, a_D, a_Z}$  be the indicator of the event of interest by interval  $k + 1$  had, possibly contrary to fact, he/she been assigned to  $A_Y = a_Y$ ,  $A_D = a_D$  and  $A_Z = a_Z$ , where  $a_Y, a_D, a_Z \in \{0, 1\}$ . We assume that an intervention that assigns  $A = a$  results in the same outcome as an intervention that assigns  $A_Y = A_D = A_Z = a$ , that is,

$$Q_{k+1}^{a_Y=a_D=a_Z=a} = Q_{k+1}^a, \quad (2)$$

for  $Q_{k+1} \in \{Y_{k+1}, D_{k+1}, Z_{k+1}\}$ . Analogous to the 2 way decomposition, the 3 way decomposition may be practically interesting in settings where we can conceive interventions on all 3 components of  $A$ . Furthermore, in settings where  $Z_k$  partition fails, it may be possible to define a 3 way decomposition that allows identifiability of separable effects. For example, Figure 1 can represent an alternative decomposition of the setting described in Figure 5a, where  $Z_k$  partition fails.

To define identifiability conditions that apply to settings with 3 way decompositions, we continue to use superscripts to denote counterfactuals and for notational simplicity we consider settings without censoring, such that e.g.  $Y_{k+1}^{a_Y, a_D, a_Z}$  is the counterfactual value of  $Y_{k+1}$  if, possibly contrary to fact,  $A_Y = a_Y, A_D = a_D, A_Z = a_Z \in \{0, 1\}$ .

Here we will only consider settings that satisfy the following assumptions:

the only causal paths from  $A_Y$  to  $D_{k+1}$  and  $Z_{k+1}, k \in \{0, \dots, K\}$  are through  $Y_j$ ,  
 $j = 0, \dots, k,$  (3)

the only causal paths from  $A_D$  to  $Y_{k+1}$  and  $Z_{k+1}, k = 0, \dots, K$  are through  $D_{j+1}$ ,  
 $j = 0, \dots, k.$  (4)

the only causal paths from  $A_Z$  to  $Y_{k+1}$  and  $D_{k+1}, k = 0, \dots, K$  are through  $Z_{j+1}$ ,  
 $j = 0, \dots, k.$  (5)

For  $k = 0, \dots, K$ , consider the separable effects

$$\Pr(Y_{k+1}^{a_Y=1, a_D, a_Z} = 1) \text{ vs. } \Pr(Y_{k+1}^{a_Y=0, a_D, a_Z} = 1), \quad (6)$$

for  $a_D, a_Z \in \{0, 1\}$ ,

$$\Pr(Y_{k+1}^{a_Y, a_D=1, a_Z} = 1) \text{ vs. } \Pr(Y_{k+1}^{a_Y, a_D=0, a_Z} = 1), \quad (7)$$

for  $a_Y, a_Z \in \{0, 1\}$ , and

$$\Pr(Y_{k+1}^{a_Y, a_D, a_Z=1} = 1) \text{ vs. } \Pr(Y_{k+1}^{a_Y, a_D, a_Z=0} = 1), \quad (8)$$

for  $a_Y, a_D \in \{0, 1\}$ .

Similar to the two component decomposition, the total effect can be expressed as a sum of the separable direct and indirect effects, in particular,

$$\begin{aligned} & \Pr(Y_{k+1}^{a_Y=1, a_D=1, a_Z=1} = 1) - \Pr(Y_{k+1}^{a_Y=0, a_D=1, a_Z=1} = 1) \\ & + \Pr(Y_{k+1}^{a_Y=0, a_D=1, a_Z=1} = 1) - \Pr(Y_{k+1}^{a_Y=0, a_D=0, a_Z=1} = 1) \\ & + \Pr(Y_{k+1}^{a_Y=0, a_D=0, a_Z=1} = 1) - \Pr(Y_{k+1}^{a_Y=0, a_D=0, a_Z=0} = 1) \\ & = \Pr(Y_{k+1}^{a=1} = 1) - \Pr(Y_{k+1}^{a=0} = 1). \end{aligned}$$

### 1.1 Interpretation of the 3 component decomposition

Under (3)-(5), the 3 way decomposition of  $A$  into  $A_D$ ,  $A_Y$  and  $A_Z$  allows us to interpret the separable effects as direct and indirect effects; (6) is the effect not emanating from  $A_D$  or  $A_Z$ , i.e. a separable direct effect, (7) is the separable indirect effect on the event of interest only emanating from  $A_D$ , and (8) is the separable indirect effect on the event of interest only emanating from  $A_Z$ .

In our running example, where  $Z_k = L_k$  encodes the (systolic and diastolic) blood pressure, it is not obvious that the 3 part decomposition is of interest; to interpret effects defined by the 3 part decomposition, we would need to conceptualize a treatment decomposition of blood pressure therapy into 3 components: the  $A_D$  component could now be defined as the component that exerts effects on mortality not through blood pressure reduction or kidney injury; that is, the substantive meaning of an intervention on  $A_D$  fundamentally changes. The  $A_Z$  component would affect the outcome of interest only through blood pressure reduction; the effect exerted by  $A_Z$  is analogous to an indirect mediation effect described by Didelez [2] under an agnostic causal model, but in our setting we also allow for competing risks. We note that under this 3 way decomposition, the  $A_Y$  component is identical to the  $A_Y$  component in the 2 way decomposition, that is, the component of blood pressure therapy only exerting direct effects on kidney injury not through blood pressure reduction.

In other settings, however, the 3 part decomposition may be feasible. For example, Robins and Richardson [1, Figure 6(d)] consider a similar decomposition in a conceptual example on the effect of cigarettes on lung cancer; they consider the effect of cigarettes smoking through nicotine, tar and other pathways.

## 1.2 Identification of the 3 component decomposition

The identifiability conditions are straightforward extensions of the conditions in Section 6. Now we must identify

$$\Pr(Y_{k+1}^{a_Y, a_D, a_Z} = 1) \text{ for } a_Y, a_D, a_Z \in \{0, 1\}.$$

First the exchangeability, consistency and positivity conditions are identical to the condition in Section 6. The dismissible component conditions read

$$\begin{aligned} Y_{k+1}(G) &\perp\!\!\!\perp (A_D(G), A_Z(G)) \mid A_Y(G), Y_k(G) = D_{k+1}(G) = 0, \bar{L}_k(G), \\ D_{k+1}(G) &\perp\!\!\!\perp (A_Y(G), A_Z(G)) \mid A_D(G), D_k(G) = Y_k(G) = 0, \bar{L}_k(G), \\ L_{k+1}(G) &\perp\!\!\!\perp (A_Y(G), A_D(G)) \mid A_Z(G), D_{k+1}(G) = Y_{k+1}(G) = 0, \bar{L}_k(G). \end{aligned}$$

Under these assumptions we can identify  $\Pr(Y_{k+1}^{a_Y, a_D, a_Z} = 1)$  for  $k = 0, \dots, K$  from

$$\begin{aligned} &\sum_{\bar{l}_k} \left[ \sum_{s=0}^k \Pr(Y_{s+1} = 1 \mid D_{s+1} = Y_s = 0, \bar{L}_s = \bar{l}_s, A = a_Y) \right. \\ &\quad \prod_{j=0}^s \left\{ \Pr(D_{j+1} = 0 \mid D_j = Y_j = 0, \bar{L}_j = \bar{l}_j, A = a_D) \right. \\ &\quad \times \Pr(Y_j = 0 \mid D_j = Y_{j-1} = 0, \bar{L}_{j-1} = \bar{l}_{j-1}, A = a_Y) \\ &\quad \left. \left. \times f(L_j = l_j \mid Y_j = D_j = 0, \bar{L}_{j-1} = \bar{l}_{j-1}, A = a_Z) \right\} \right], \end{aligned} \quad (9)$$

which follows from a similar derivation from that in Appendix B. The identifiability conditions under the 3 component decomposition require stronger restrictions on the unmeasured variables, compared to the settings in Section 6; unmeasured common causes of any pair in  $(Y_{k+1}, D_{j+1}, L_{m+1}), k, j, m \in \{0, \dots, K\}$  can violate the dismissible component conditions. In particular, an unmeasured common cause  $U_{L,Y}$  of  $L_k$  and  $Y_k$  will violate the dismissible component condition, as shown in grey in Figure 2.

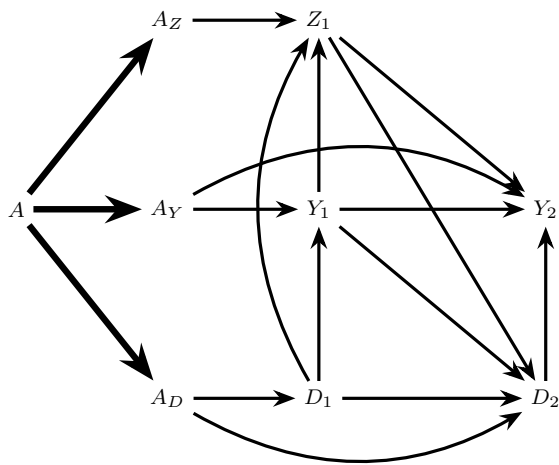

Fig. 1: Treatment  $A$  is decomposed into 3 components.

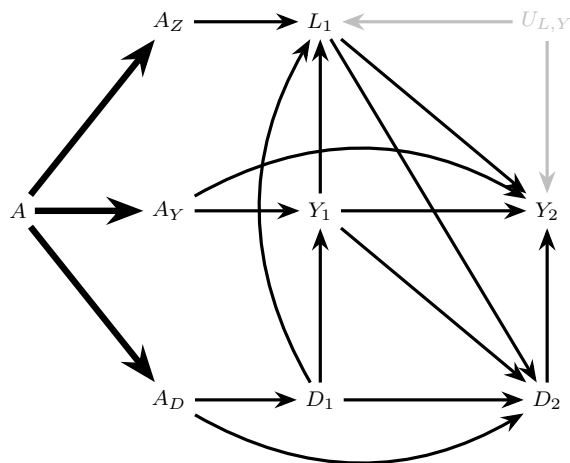

Fig. 2: Treatment is decomposed into 3 components, such that  $L_1 = Z_1$ . The variable  $U_{L,Y}$  would violate the dismissible component conditions here.

## References

1. James M Robins and Thomas S Richardson. Alternative graphical causal models and the identification of direct effects. *Causality and psychopathology: Finding the determinants of disorders and their cures*, pages 103–158, 2010.
2. Vanessa Didelez. Defining causal mediation with a longitudinal mediator and a survival outcome. *Lifetime Data Analysis*, pages 1–18, 2018.
